# Supplementary material
Source: MDPI journal article supplement (https://www.mdpi.com/search?q=jof-07-00175)
Supplement: s001 [file jof-07-00175-s001.pdf]

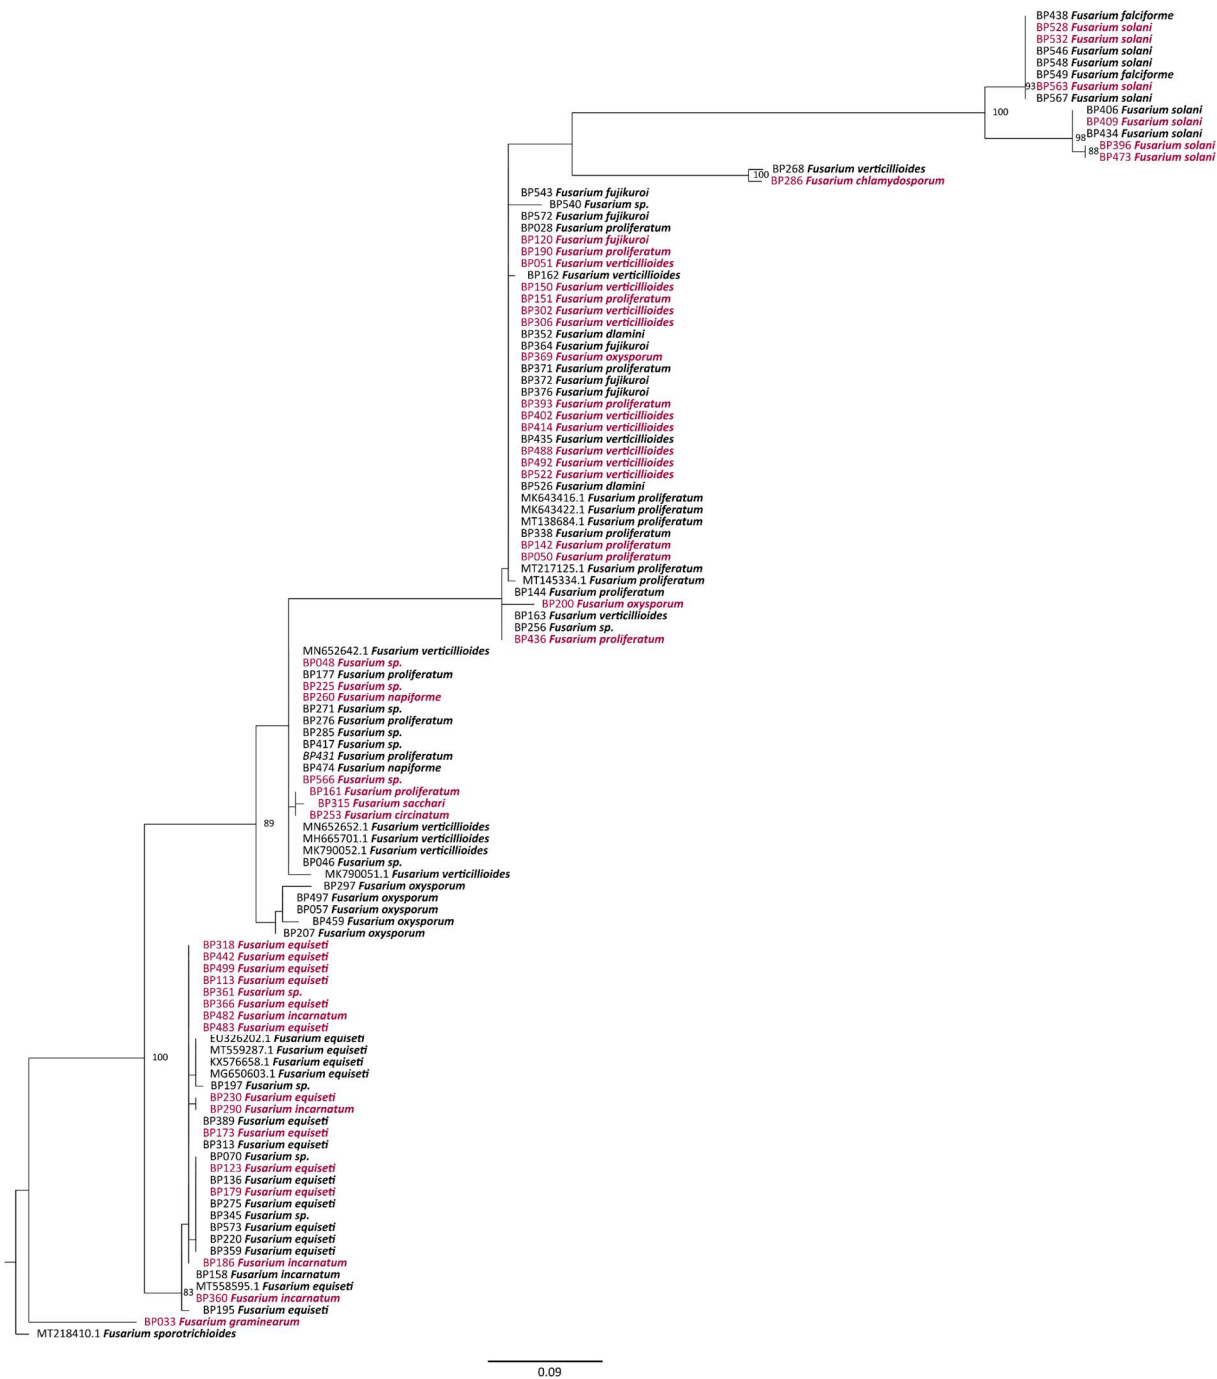

**Figure S1.** Phylogenetic tree of *Fusarium* species computed by Maximum Likelihood (ML) analysis (JC+I+G as the best fit model) and based on the ITS sequences dataset. Only ML bootstrap branches that support values greater than 70% are shown. Strains isolated from infected and healthy fruitlets are indicated in red and black respectively. The tree is rooted with *F. sporotrichioides* accession MT218410.1.

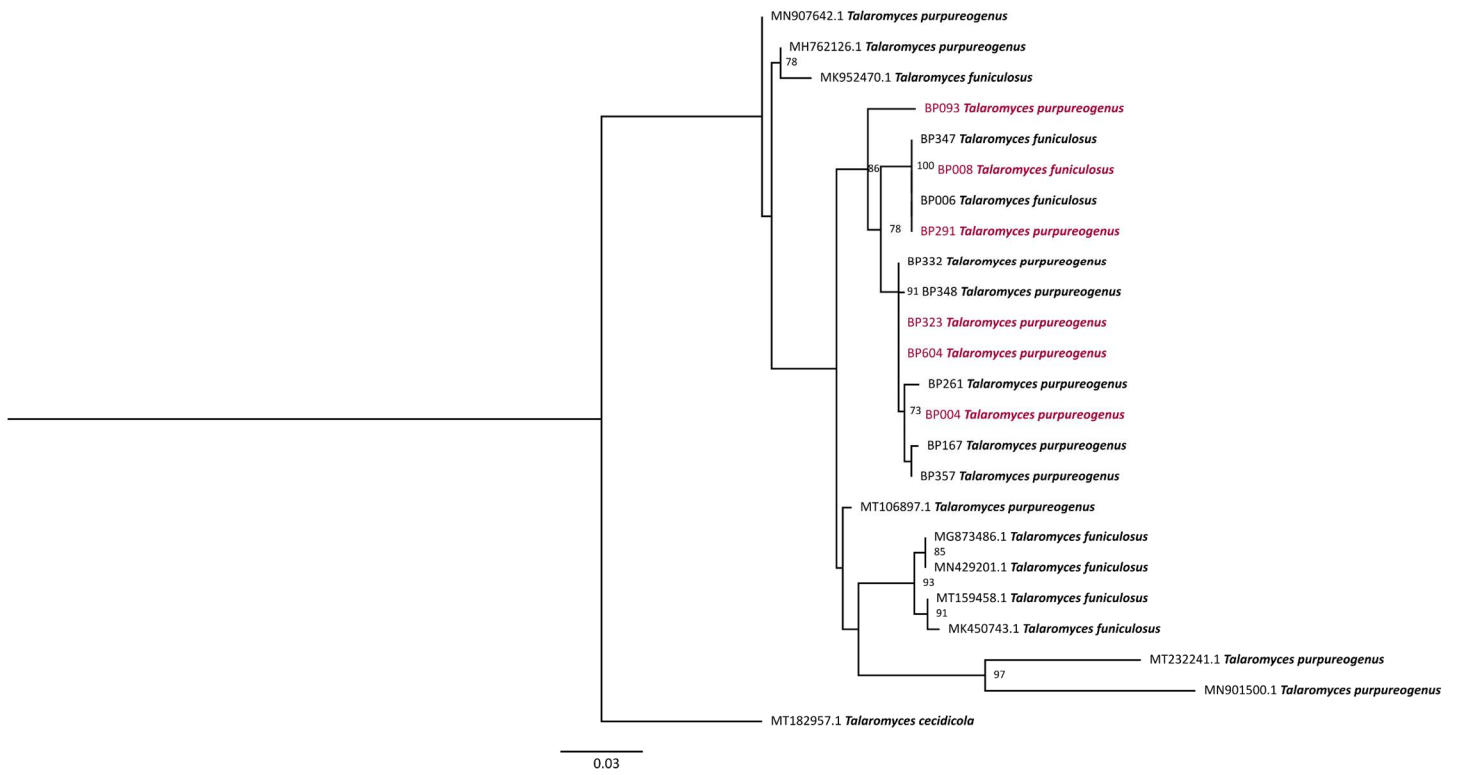

**Figure S2.** Phylogenetic tree of *Talaromyces* species computed by Maximum Likelihood (ML) analysis (K80+G as the best fit model) and based on the ITS sequences dataset. Only ML bootstrap branches that support values greater than 70% are shown. Strains isolated from infected and healthy fruitlets are indicated in red and black respectively. The tree is rooted with *T. cecidicola* accession MT182957.1.

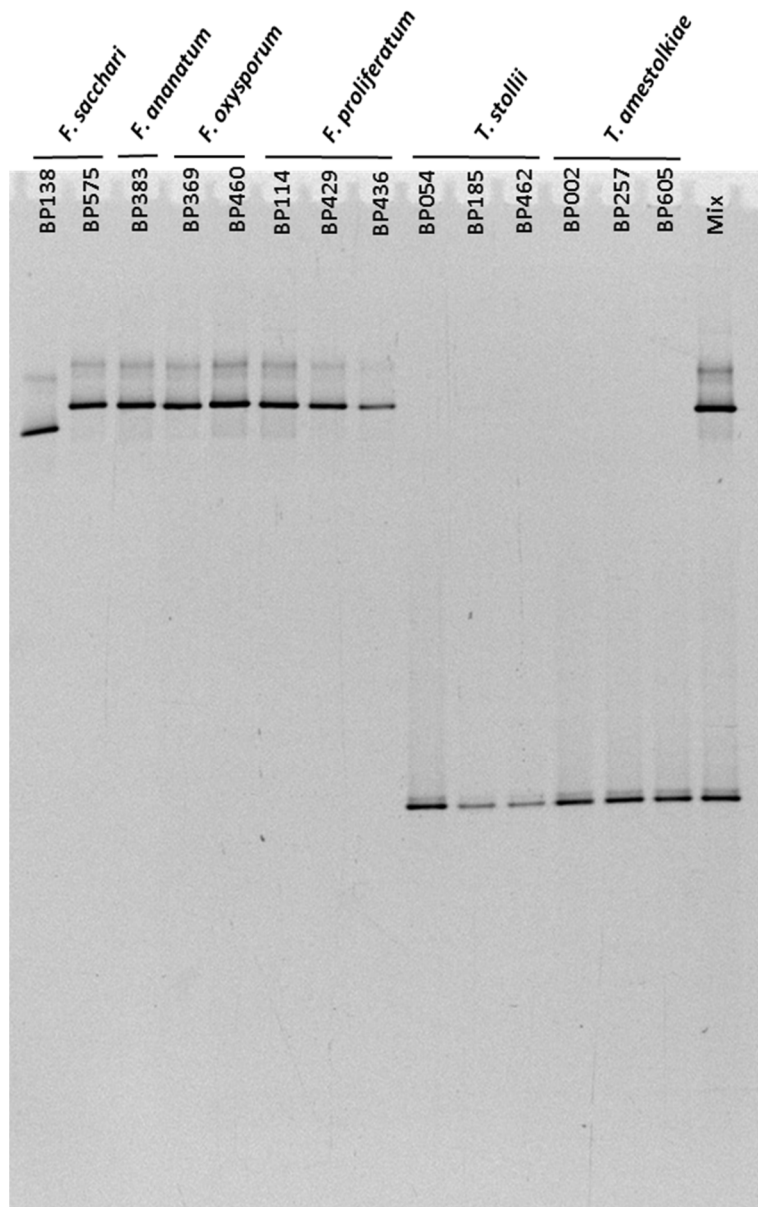

**Figure S3.** Reference DGGE profiles over ITS-1 region of DNA extracted from pure strains evaluated in Koch's postulates. (Mix) indicates the combined migration of *F. ananatum* strain BP383, *F. sacchari* strain BP575, *F. oxysporum* strain BP460, *F. proliferatum* strain BP429, *T. stollii* strain BP054, and *T. amestolkiae* strain BP002.

**Table S1.** Identification of fungal species isolated from healthy and naturally infected pineapple fruitlets.

| Isolate ID | Identification                        | Sampled tissue    | Fragment size (bp) | Identity (%) | E-value   | Locus            | GenBank accession number |
|------------|---------------------------------------|-------------------|--------------------|--------------|-----------|------------------|--------------------------|
| BP001      | <i>Talaromyces stollii</i>            | healthy fruitlet  | 398                | 100          | 0         | $\beta$ -tubulin | JX315634.1               |
| BP002      | <i>Talaromyces amestolkiae</i>        | infected fruitlet | 400                | 99.25        | 0         | $\beta$ -tubulin | MH287207.1               |
| BP003      | <i>Talaromyces amestolkiae</i>        | infected fruitlet | 414                | 100          | 0         | $\beta$ -tubulin | KJ413360.1               |
| BP004      | <i>Talaromyces purpureogenus</i>      | infected fruitlet | 567                | 99.47        | 0         | ITS              | MF475916.1               |
| BP006      | <i>Talaromyces funiculosus</i>        | healthy fruitlet  | 562                | 99.64        | 0         | ITS              | AB893941.1               |
| BP008      | <i>Talaromyces funiculosus</i>        | infected fruitlet | 548                | 99.64        | 0         | ITS              | AB893941.1               |
| BP012      | <i>Talaromyces stollii</i>            | infected fruitlet | 320                | 100          | 4,00E-165 | $\beta$ -tubulin | JX965359.1               |
| BP014      | <i>Talaromyces stollii</i>            | infected fruitlet | 406                | 100          | 0         | $\beta$ -tubulin | JX315634.1               |
| BP016      | <i>Talaromyces stollii</i>            | healthy fruitlet  | 406                | 100          | 0         | $\beta$ -tubulin | JX315634.1               |
| BP018      | <i>Talaromyces stollii</i>            | healthy fruitlet  | 406                | 100          | 0         | $\beta$ -tubulin | JX315634.1               |
| BP019      | <i>Talaromyces stollii</i>            | infected fruitlet | 406                | 100          | 0         | $\beta$ -tubulin | JX315634.1               |
| BP020      | <i>Talaromyces stollii</i>            | infected fruitlet | 406                | 100          | 0         | $\beta$ -tubulin | JX315634.1               |
| BP022      | <i>Talaromyces stollii</i>            | infected fruitlet | 406                | 100          | 0         | $\beta$ -tubulin | JX315634.1               |
| BP025      | <i>Talaromyces amestolkiae</i>        | healthy fruitlet  | 414                | 100          | 0         | $\beta$ -tubulin | MH287207.1               |
| BP027      | <i>Trichoderma trixiae</i>            | infected fruitlet | 134                | 100          | 5,00E-62  | ITS              | MN889512.1               |
| BP028      | <i>Fusarium proliferatum</i>          | healthy fruitlet  | 532                | 99,81        | 0         | ITS              | MN170571.1               |
| BP029      | <i>Trichoderma paraviridescens</i>    | infected fruitlet | 587                | 100          | 0         | ITS              | MK418756.1               |
| BP030      | <i>Aspergillus niger</i>              | infected fruitlet | 579                | 100          | 0         | ITS              | JF439461.1               |
| BP031      | <i>Pestalotiopsis vismiae</i>         | infected fruitlet | 587                | 99,66        | 0         | ITS              | KP747694.1               |
| BP033      | <i>Fusarium graminearum</i>           | infected fruitlet | 514                | 100          | 0         | ITS              | MK460853.1               |
| BP034      | <i>Talaromyces stollii</i>            | healthy fruitlet  | 405                | 100          | 0         | $\beta$ -tubulin | JX315634.1               |
| BP035      | <i>Fusarium cortaderiae</i>           | infected fruitlet | 290                | 99,66        | 4,00E-148 | $\beta$ -tubulin | AH012626.2               |
| BP037      | <i>Trichoderma sp.</i>                | infected fruitlet | 596                | 99.83        | 0         | ITS              | KX449479.1               |
| BP038      | <i>Rhizopus stolonifer</i>            | infected fruitlet | 788                | 100          | 0         | ITS              | MF461025.1               |
| BP039      | <i>Fusarium chlamydosporum</i>        | healthy fruitlet  | 272                | 100          | 1,00E-139 | $\beta$ -tubulin | KJ125830.1               |
| BP041      | <i>Epicoccum sorghinum</i>            | infected fruitlet | 298                | 99,33        | 2,00E-150 | $\beta$ -tubulin | MF987525.1               |
| BP042      | <i>Trichoderma harzianum</i>          | infected fruitlet | 565                | 100          | 0         | ITS              | JN116710.1               |
| BP043      | <i>Aspergillus niger</i>              | healthy fruitlet  | 450                | 99,56        | 0         | ITS              | MN788116.1               |
| BP044      | <i>Fusarium proliferatum</i>          | healthy fruitlet  | 665                | 100          | 0.0       | EF1 $\alpha$     | KF993985.1               |
| BP046      | <i>Fusarium sp.</i>                   | healthy fruitlet  | 528                | 100          | 0         | ITS              | HQ630965.1               |
| BP048      | <i>Fusarium sp.</i>                   | infected fruitlet | 539                | 100          | 0         | ITS              | HQ630965.1               |
| BP050      | <i>Fusarium proliferatum</i>          | infected fruitlet | 544                | 99,26        | 0         | ITS              | MN170571.1               |
| BP051      | <i>Fusarium verticillioides</i>       | infected fruitlet | 531                | 100          | 0         | ITS              | KR183784.1               |
| BP054      | <i>Talaromyces stollii</i>            | infected fruitlet | 406                | 99,51        | 0         | $\beta$ -tubulin | JX315634.1               |
| BP057      | <i>Fusarium oxysporum</i>             | healthy fruitlet  | 524                | 100          | 0         | ITS              | MH752745.1               |
| BP059      | <i>Aspergillus awamori</i>            | healthy fruitlet  | 505                | 100          | 0         | $\beta$ -tubulin | KY416558.1               |
| BP061      | <i>Fusarium ananatum</i>              | healthy fruitlet  | 632                | 100          | 0         | EF1 $\alpha$     | MT010996.1               |
| BP062      | <i>Talaromyces funiculosus</i>        | infected fruitlet | 414                | 99,52        | 0         | $\beta$ -tubulin | MK208457.1               |
| BP063      | <i>Epicoccum sorghinum</i>            | healthy fruitlet  | 312                | 99,36        | 0         | $\beta$ -tubulin | MF987525.1               |
| BP065      | <i>Fusarium ananatum</i>              | healthy fruitlet  | 663                | 100          | 0         | EF1 $\alpha$     | MT010996.1               |
| BP070      | <i>Fusarium sp.</i>                   | healthy fruitlet  | 523                | 99,81        | 0         | ITS              | MG664720.1               |
| BP071      | <i>Trichoderma paraviridescens</i>    | healthy fruitlet  | 586                | 100          | 0         | ITS              | MF782827.1               |
| BP072      | <i>Fusarium proliferatum</i>          | healthy fruitlet  | 668                | 100          | 0         | EF1 $\alpha$     | KU872092.1               |
| BP076      | <i>Fusarium proliferatum</i>          | healthy fruitlet  | 669                | 99,85        | 0         | EF1 $\alpha$     | KF993985.1               |
| BP077      | <i>Talaromyces amestolkiae</i>        | healthy fruitlet  | 422                | 100          | 0         | $\beta$ -tubulin | MH287207.1               |
| BP078      | <i>Pestalotiopsis trachicarpicola</i> | healthy fruitlet  | 440                | 100          | 0         | $\beta$ -tubulin | MN295594.1               |
| BP081      | <i>Talaromyces stollii</i>            | healthy fruitlet  | 398                | 100          | 0         | $\beta$ -tubulin | JX315634.1               |
| BP082      | <i>Talaromyces amestolkiae</i>        | infected fruitlet | 401                | 100          | 0         | $\beta$ -tubulin | MH287207.1               |
| BP084      | <i>Aspergillus niger</i>              | healthy fruitlet  | 508                | 100          | 0         | $\beta$ -tubulin | HQ632734.1               |

Table S1. Continued

| Isolate ID | Identification                        | Sampled tissue    | Fragment size (bp) | Identity (%) | E-value   | Locus            | GenBank accession number |
|------------|---------------------------------------|-------------------|--------------------|--------------|-----------|------------------|--------------------------|
| BP086      | <i>Talaromyces amestolkiae</i>        | healthy fruitlet  | 414                | 100          | 0         | $\beta$ -tubulin | KJ413360.1               |
| BP087      | <i>Talaromyces stollii</i>            | infected fruitlet | 406                | 99,75        | 0         | $\beta$ -tubulin | JX315634.1               |
| BP088      | <i>Talaromyces stollii</i>            | infected fruitlet | 398                | 100          | 0         | $\beta$ -tubulin | JX315634.1               |
| BP091      | <i>Trichoderma asperellum</i>         | infected fruitlet | 43                 | 100          | 1,00E-13  | ITS              | KX538815.1               |
| BP093      | <i>Talaromyces purpureogenus</i>      | infected fruitlet | 523                | 100          | 0         | ITS              | MH185977.1               |
| BP096      | <i>Pestalotiopsis trachicarpicola</i> | infected fruitlet | 440                | 100          | 0         | $\beta$ -tubulin | MN295594.1               |
| BP097      | <i>Talaromyces amestolkiae</i>        | infected fruitlet | 422                | 100          | 0         | $\beta$ -tubulin | KJ413360.1               |
| BP100      | <i>Aspergillus niger</i>              | infected fruitlet | 573                | 100          | 0         | ITS              | KY357318.1               |
| BP101      | <i>Fusarium ananatum</i>              | infected fruitlet | 666                | 100          | 0         | EF1 $\alpha$     | MT010996.1               |
| BP102      | <i>Talaromyces amestolkiae</i>        | infected fruitlet | 408                | 100          | 0         | $\beta$ -tubulin | KJ413360.1               |
| BP104      | <i>Talaromyces amestolkiae</i>        | infected fruitlet | 408                | 100          | 0         | $\beta$ -tubulin | LT559068.1               |
| BP106      | <i>Clonostachys weningii</i>          | infected fruitlet | 496                | 100          | 0         | ITS              | NR_119651.1              |
| BP107      | <i>Aspergillus flavus</i>             | infected fruitlet | 424                | 100          | 0         | ITS              | MN955851.1               |
| BP109      | <i>Fusarium proliferatum</i>          | healthy fruitlet  | 659                | 100          | 0         | EF1 $\alpha$     | KF993985.1               |
| BP113      | <i>Fusarium equiseti</i>              | infected fruitlet | 514                | 100          | 0         | ITS              | MK680159.1               |
| BP114      | <i>Fusarium proliferatum</i>          | infected fruitlet | 658                | 100          | 0         | EF1 $\alpha$     | KF993985.1               |
| BP118      | <i>Fusarium proliferatum</i>          | healthy fruitlet  | 655                | 99,85        | 0         | EF1 $\alpha$     | MN386746.1               |
| BP120      | <i>Fusarium fujikuroi</i>             | infected fruitlet | 527                | 100          | 0         | ITS              | MF281281.2               |
| BP121      | <i>Fusarium ananatum</i>              | infected fruitlet | 646                | 100          | 0         | EF1 $\alpha$     | MT010996.1               |
| BP123      | <i>Fusarium equiseti</i>              | infected fruitlet | 511                | 100          | 0         | ITS              | KF624787.1               |
| BP127      | <i>Fusarium proliferatum</i>          | infected fruitlet | 646                | 100          | 0         | EF1 $\alpha$     | MN386746.1               |
| BP129      | <i>Trichoderma sp.</i>                | infected fruitlet | 598                | 99,83        | 0         | ITS              | MK870964.1               |
| BP130      | <i>Talaromyces amestolkiae</i>        | healthy fruitlet  | 414                | 100          | 0         | $\beta$ -tubulin | KJ413360.1               |
| BP136      | <i>Fusarium equiseti</i>              | healthy fruitlet  | 516                | 100          | 0         | ITS              | KF624787.1               |
| BP138      | <i>Fusarium sacchari</i>              | infected fruitlet | 663                | 100          | 0         | EF1 $\alpha$     | MN193868.1               |
| BP139      | <i>Clonostachys sp.</i>               | healthy fruitlet  | 503                | 100          | 0         | ITS              | MH681594.1               |
| BP141      | <i>Bionectria ochroleuca</i>          | healthy fruitlet  | 550                | 100          | 0         | ITS              | EU552110.1               |
| BP144      | <i>Fusarium proliferatum</i>          | healthy fruitlet  | 528                | 100          | 0         | ITS              | MH712288.1               |
| BP147      | <i>Fusarium proliferatum</i>          | infected fruitlet | 644                | 99,84        | 0         | EF1 $\alpha$     | MN175178.1               |
| BP148      | <i>Fusarium proliferatum</i>          | healthy fruitlet  | 654                | 99,85        | 0         | EF1 $\alpha$     | KU872092.1               |
| BP150      | <i>Fusarium verticillioides</i>       | infected fruitlet | 537                | 99,63        | 0         | ITS              | MT594370.1               |
| BP151      | <i>Fusarium proliferatum</i>          | infected fruitlet | 523                | 100          | 0         | ITS              | MK336501.1               |
| BP154      | <i>Fusarium incarnatum</i>            | infected fruitlet | 292                | 99,66        | 3,00E-149 | $\beta$ -tubulin | MK439850.1               |
| BP155      | <i>Fusarium proliferatum</i>          | healthy fruitlet  | 644                | 99,84        | 0         | EF1 $\alpha$     | KF993985.1               |
| BP156      | <i>Fusarium proliferatum</i>          | healthy fruitlet  | 663                | 100          | 0         | EF1 $\alpha$     | KF993985.1               |
| BP158      | <i>Fusarium incarnatum</i>            | healthy fruitlet  | 525                | 99,81        | 0         | ITS              | MN882829.1               |
| BP159      | <i>Fusarium proliferatum</i>          | healthy fruitlet  | 663                | 100          | 0         | EF1 $\alpha$     | FJ538242.1               |
| BP161      | <i>Fusarium proliferatum</i>          | infected fruitlet | 531                | 99,62        | 0         | ITS              | MH591759.1               |
| BP162      | <i>Fusarium verticillioides</i>       | healthy fruitlet  | 541                | 99,82        | 0         | ITS              | MT594370.1               |
| BP163      | <i>Fusarium verticillioides</i>       | healthy fruitlet  | 527                | 100          | 0         | ITS              | MT126609.1               |
| BP165      | <i>Fusarium proliferatum</i>          | healthy fruitlet  | 292                | 99,66        | 1,00E-148 | $\beta$ -tubulin | MH398186.1               |
| BP167      | <i>Talaromyces purpureogenus</i>      | healthy fruitlet  | 513                | 99,61        | 0         | ITS              | MF476006.1               |
| BP169      | <i>Glomus clarum</i>                  | healthy fruitlet  | 102                | 100          | 0         | ITS              | AY035654.1               |
| BP170      | <i>Diaporthe masirevicii</i>          | infected fruitlet | 487                | 99,79        | 0         | $\beta$ -tubulin | MF668289.1               |
| BP173      | <i>Fusarium equiseti</i>              | infected fruitlet | 512                | 99,8         | 0         | ITS              | MG650603.1               |
| BP177      | <i>Fusarium proliferatum</i>          | healthy fruitlet  | 530                | 100          | 0         | ITS              | MH591759.1               |
| BP179      | <i>Fusarium equiseti</i>              | infected fruitlet | 523                | 100          | 0         | ITS              | KF624787.1               |
| BP180      | <i>Fusarium proliferatum</i>          | infected fruitlet | 657                | 100          | 0         | EF1 $\alpha$     | MK442093.1               |
| BP185      | <i>Talaromyces stollii</i>            | infected fruitlet | 398                | 100          | 0         | $\beta$ -tubulin | JX315634.1               |
| BP186      | <i>Fusarium incarnatum</i>            | infected fruitlet | 467                | 100          | 0         | ITS              | MK336548.1               |

Table S1. Continued

| Isolate ID | Identification                        | Sampled tissue    | Fragment size (bp) | Identity (%) | E-value   | Locus            | GenBank accession number |
|------------|---------------------------------------|-------------------|--------------------|--------------|-----------|------------------|--------------------------|
| BP187      | <i>Fusarium ananatum</i>              | healthy fruitlet  | 306                | 98,39        | 1,00E-144 | $\beta$ -tubulin | LC386036.1               |
| BP188      | <i>Fusarium ananatum</i>              | infected fruitlet | 644                | 100          | 0         | EF1 $\alpha$     | MT010996.1               |
| BP190      | <i>Fusarium proliferatum</i>          | infected fruitlet | 539                | 99,81        | 0         | ITS              | MH055399.1               |
| BP191      | <i>Fusarium equiseti</i>              | healthy fruitlet  | 294                | 100          | 5,00E-152 | $\beta$ -tubulin | MK278900.1               |
| BP194      | <i>Talaromyces stollii</i>            | infected fruitlet | 398                | 100          | 0         | $\beta$ -tubulin | JX315634.1               |
| BP195      | <i>Fusarium equiseti</i>              | healthy fruitlet  | 512                | 99,80        | 0         | ITS              | MN589630.1               |
| BP197      | <i>Fusarium sp.</i>                   | healthy fruitlet  | 517                | 100          | 0         | ITS              | MG664720.1               |
| BP199      | <i>Aspergillus fumigatus</i>          | infected fruitlet | 504                | 100          | 0         | $\beta$ -tubulin | MH844690.1               |
| BP200      | <i>Fusarium oxysporum</i>             | infected fruitlet | 88                 | 98,86        | 6,00E-36  | ITS              | MK729614.1               |
| BP202      | <i>Aspergillus niger</i>              | healthy fruitlet  | 543                | 100          | 0         | ITS              | MK336494.1               |
| BP204      | <i>Fusarium oxysporum</i>             | infected fruitlet | 658                | 100          | 0         | EF1 $\alpha$     | CP053267.1               |
| BP207      | <i>Fusarium oxysporum</i>             | infected fruitlet | 527                | 100          | 0         | ITS              | KU847855.1               |
| BP208      | <i>Fusarium ficicrescens</i>          | healthy fruitlet  | 286                | 99,3         | 7,00E-143 | $\beta$ -tubulin | KP662895.1               |
| BP210      | <i>Talaromyces amestolkiae</i>        | healthy fruitlet  | 408                | 100          | 0         | $\beta$ -tubulin | LT559068.1               |
| BP211      | <i>Talaromyces stollii</i>            | infected fruitlet | 398                | 100          | 0         | $\beta$ -tubulin | JX315634.1               |
| BP212      | <i>Pestalotiopsis trachicarpicola</i> | infected fruitlet | 434                | 100          | 0         | $\beta$ -tubulin | MN295594.1               |
| BP213      | <i>Talaromyces stollii</i>            | infected fruitlet | 398                | 100          | 0         | $\beta$ -tubulin | JX315634.1               |
| BP215      | <i>Talaromyces stollii</i>            | healthy fruitlet  | 398                | 100          | 0         | $\beta$ -tubulin | JX315634.1               |
| BP216      | <i>Pestalotiopsis trachicarpicola</i> | healthy fruitlet  | 441                | 100          | 0         | $\beta$ -tubulin | MN295594.1               |
| BP218      | <i>Fusarium proliferatum</i>          | healthy fruitlet  | 663                | 99,85        | 0         | EF1 $\alpha$     | KF993985.1               |
| BP219      | <i>Fusarium oxysporum</i>             | healthy fruitlet  | 660                | 100          | 0         | EF1 $\alpha$     | MG000154.1               |
| BP220      | <i>Fusarium equiseti</i>              | healthy fruitlet  | 511                | 100          | 0         | ITS              | MN589630.1               |
| BP222      | <i>Fusarium proliferatum</i>          | infected fruitlet | 661                | 100          | 0         | EF1 $\alpha$     | KF993985.1               |
| BP224      | <i>Fusarium chlamydosporum</i>        | healthy fruitlet  | 272                | 100          | 2,00E-138 | $\beta$ -tubulin | KJ125830.1               |
| BP225      | <i>Fusarium sp.</i>                   | infected fruitlet | 528                | 100          | 0         | ITS              | HQ630965.1               |
| BP230      | <i>Fusarium equiseti</i>              | infected fruitlet | 487                | 99,79        | 0         | ITS              | MN589630.1               |
| BP236      | <i>Fusarium ananatum</i>              | infected fruitlet | 664                | 100          | 0         | EF1 $\alpha$     | MT010996.1               |
| BP238      | <i>Fusarium ananatum</i>              | infected fruitlet | 641                | 100          | 0         | EF1 $\alpha$     | MT010996.1               |
| BP240      | <i>Talaromyces stollii</i>            | infected fruitlet | 392                | 100          | 0         | $\beta$ -tubulin | JX315634.1               |
| BP241      | <i>Fusarium ananatum</i>              | healthy fruitlet  | 652                | 99,85        | 0         | EF1 $\alpha$     | MT010996.1               |
| BP243      | <i>Fusarium ananatum</i>              | healthy fruitlet  | 656                | 100          | 0         | EF1 $\alpha$     | MT010996.1               |
| BP247      | <i>Fusarium ananatum</i>              | healthy fruitlet  | 653                | 100          | 0         | EF1 $\alpha$     | MT010996.1               |
| BP251      | <i>Talaromyces amestolkiae</i>        | healthy fruitlet  | 408                | 100          | 0         | $\beta$ -tubulin | MH287207.1               |
| BP253      | <i>Fusarium circinatum</i>            | infected fruitlet | 515                | 100          | 0         | ITS              | MK334369.1               |
| BP254      | <i>Aspergillus novoparasiticus</i>    | infected fruitlet | 562                | 100          | 0         | ITS              | MH279415.1               |
| BP256      | <i>Fusarium sp.</i>                   | healthy fruitlet  | 517                | 100          | 0         | ITS              | MK355727.1               |
| BP257      | <i>Talaromyces amestolkiae</i>        | infected fruitlet | 407                | 100          | 0         | $\beta$ -tubulin | KJ413360.1               |
| BP259      | <i>Penicillium sp.</i>                | healthy fruitlet  | 563                | 100          | 0         | ITS              | EU330619.1               |
| BP260      | <i>Fusarium napiforme</i>             | infected fruitlet | 515                | 100          | 0         | ITS              | MH862670.1               |
| BP261      | <i>Talaromyces purpureogenus</i>      | healthy fruitlet  | 502                | 99,8         | 0         | ITS              | MF476006.1               |
| BP263      | <i>Diaporthe sp.</i>                  | healthy fruitlet  | 461                | 98,05        | 0         | $\beta$ -tubulin | MH220834.1               |
| BP265      | <i>Talaromyces amestolkiae</i>        | healthy fruitlet  | 401                | 100          | 0         | $\beta$ -tubulin | KJ413360.1               |
| BP268      | <i>Fusarium verticillioides</i>       | healthy fruitlet  | 543                | 100          | 0         | ITS              | MH863977.1               |
| BP269      | <i>Aspergillus awamori</i>            | healthy fruitlet  | 506                | 100          | 0         | $\beta$ -tubulin | KY416558.1               |
| BP271      | <i>Fusarium sp.</i>                   | healthy fruitlet  | 506                | 100          | 0         | ITS              | MH777054.1               |
| BP273      | <i>Talaromyces amestolkiae</i>        | healthy fruitlet  | 421                | 100          | 0         | $\beta$ -tubulin | KJ413360.1               |
| BP275      | <i>Fusarium equiseti</i>              | healthy fruitlet  | 511                | 100          | 0         | ITS              | MN589627.1               |
| BP276      | <i>Fusarium proliferatum</i>          | healthy fruitlet  | 529                | 100          | 0         | ITS              | MH591759.1               |
| BP278      | <i>Fusarium oxysporum</i>             | healthy fruitlet  | 645                | 100          | 0         | EF1 $\alpha$     | CP053267.1               |
| BP280      | <i>Fusarium incarnatum</i>            | healthy fruitlet  | 251                | 100          | 8,00E-127 | $\beta$ -tubulin | MK439849.1               |

Table S1. Continued

| Isolate ID | Identification                   | Sampled tissue    | Fragment size (bp) | Identity (%) | E-value   | Locus            | GenBank accession number |
|------------|----------------------------------|-------------------|--------------------|--------------|-----------|------------------|--------------------------|
| BP285      | <i>Fusarium</i> sp.              | healthy fruitlet  | 514                | 100          | 0         | ITS              | MT530119.1               |
| BP286      | <i>Fusarium chlamydosporum</i>   | infected fruitlet | 533                | 99,81        | 0         | ITS              | MG250448.1               |
| BP288      | <i>Diaporthe kongii</i>          | infected fruitlet | 544                | 99,26        | 0         | ITS              | KR024740.1               |
| BP290      | <i>Fusarium incarnatum</i>       | infected fruitlet | 496                | 99,8         | 0         | ITS              | MN882829.1               |
| BP291      | <i>Talaromyces purpureogenus</i> | infected fruitlet | 547                | 99,63        | 0         | ITS              | MK749843.1               |
| BP293      | <i>Fusarium proliferatum</i>     | healthy fruitlet  | 676                | 100          | 0         | EF1 $\alpha$     | KF993985.1               |
| BP296      | <i>Fusarium equiseti</i>         | healthy fruitlet  | 294                | 99,66        | 5,00E-149 | $\beta$ -tubulin | MK278900.1               |
| BP297      | <i>Fusarium oxysporum</i>        | infected fruitlet | 364                | 100          | 0         | ITS              | EU273520.1               |
| BP302      | <i>Fusarium verticillioides</i>  | infected fruitlet | 529                | 100          | 0         | ITS              | MT594370.1               |
| BP305      | <i>Fusarium ananatum</i>         | healthy fruitlet  | 659                | 100          | 0         | EF1 $\alpha$     | MT010996.1               |
| BP306      | <i>Fusarium verticillioides</i>  | infected fruitlet | 541                | 99,82        | 0         | ITS              | MT594370.1               |
| BP308      | <i>Fusarium ananatum</i>         | infected fruitlet | 671                | 100          | 0         | EF1 $\alpha$     | MT010996.1               |
| BP313      | <i>Fusarium equiseti</i>         | healthy fruitlet  | 506                | 99,8         | 0         | ITS              | MN589629.1               |
| BP315      | <i>Fusarium sacchari</i>         | infected fruitlet | 438                | 100          | 0         | ITS              | KC464631.1               |
| BP316      | <i>Lasiodiplodia mahajangana</i> | healthy fruitlet  | 398                | 100          | 0         | ITS              | MH057188.1               |
| BP318      | <i>Fusarium equiseti</i>         | infected fruitlet | 514                | 100          | 0         | ITS              | MH578585.1               |
| BP319      | <i>Fusarium proliferatum</i>     | healthy fruitlet  | 658                | 100          | 0         | EF1 $\alpha$     | KU872092.1               |
| BP320      | <i>Talaromyces amestolkiae</i>   | healthy fruitlet  | 414                | 100          | 0         | $\beta$ -tubulin | KJ413360.1               |
| BP323      | <i>Talaromyces purpureogenus</i> | infected fruitlet | 566                | 100          | 0         | ITS              | MF475966.1               |
| BP324      | <i>Fusarium proliferatum</i>     | healthy fruitlet  | 659                | 100          | 0         | EF1 $\alpha$     | MK442093.1               |
| BP326      | <i>Fusarium ananatum</i>         | infected fruitlet | 671                | 100          | 0         | EF1 $\alpha$     | MT010996.1               |
| BP331      | <i>Talaromyces amestolkiae</i>   | healthy fruitlet  | 414                | 100          | 0         | $\beta$ -tubulin | KJ413360.1               |
| BP332      | <i>Talaromyces purpureogenus</i> | healthy fruitlet  | 556                | 99,82        | 0         | ITS              | KJ528885.1               |
| BP334      | <i>Talaromyces stollii</i>       | infected fruitlet | 398                | 100          | 0         | $\beta$ -tubulin | JX315634.1               |
| BP335      | <i>Curvularia lunata</i>         | infected fruitlet | 533                | 100          | 0         | ITS              | MN971669.1               |
| BP338      | <i>Fusarium proliferatum</i>     | healthy fruitlet  | 538                | 100          | 0         | ITS              | MT466521.1               |
| BP340      | <i>Talaromyces stollii</i>       | healthy fruitlet  | 398                | 100          | 0         | $\beta$ -tubulin | JX315634.1               |
| BP341      | <i>Penicillium</i> sp.           | infected fruitlet | 576                | 99,48        | 0         | ITS              | KF931337.1               |
| BP342      | <i>Fusarium ananatum</i>         | healthy fruitlet  | 661                | 100          | 0         | EF1 $\alpha$     | MT010996.1               |
| BP343      | <i>Talaromyces amestolkiae</i>   | healthy fruitlet  | 422                | 99,29        | 0         | $\beta$ -tubulin | KJ413360.1               |
| BP344      | <i>Talaromyces stollii</i>       | infected fruitlet | 398                | 100          | 0         | $\beta$ -tubulin | JX315634.1               |
| BP345      | <i>Fusarium</i> sp.              | healthy fruitlet  | 511                | 100          | 0         | ITS              | KM979504.1               |
| BP346      | <i>Talaromyces stollii</i>       | healthy fruitlet  | 396                | 99,75        | 0         | $\beta$ -tubulin | JX315634.1               |
| BP347      | <i>Talaromyces funiculosus</i>   | healthy fruitlet  | 501                | 99,6         | 0         | ITS              | AB893941.1               |
| BP348      | <i>Talaromyces purpureogenus</i> | healthy fruitlet  | 556                | 99,82        | 0         | ITS              | KJ528885.1               |
| BP349      | <i>Penicillium</i> sp.           | healthy fruitlet  | 557                | 99,82        | 0         | ITS              | EU330619.1               |
| BP351      | <i>Trichoderma erinaceum</i>     | infected fruitlet | 228                | 100          | 2,00E-115 | ITS              | MK109820.1               |
| BP352      | <i>Fusarium dlamini</i>          | infected fruitlet | 548                | 100          | 0         | ITS              | MN173109.1               |
| BP353      | <i>Fusarium ananatum</i>         | infected fruitlet | 656                | 100          | 0         | EF1 $\alpha$     | MT010996.1               |
| BP356      | <i>Fusarium ananatum</i>         | healthy fruitlet  | 656                | 100          | 0         | EF1 $\alpha$     | MT010996.1               |
| BP357      | <i>Talaromyces purpureogenus</i> | healthy fruitlet  | 513                | 99,81        | 0         | ITS              | MF476006.1               |
| BP359      | <i>Fusarium equiseti</i>         | healthy fruitlet  | 487                | 100          | 0         | ITS              | MN589627.1               |
| BP360      | <i>Fusarium incarnatum</i>       | infected fruitlet | 471                | 100          | 0         | ITS              | MN882828.1               |
| BP361      | <i>Fusarium</i> sp.              | infected fruitlet | 527                | 99,81        | 0         | ITS              | EU330623.1               |
| BP364      | <i>Fusarium fujikuroi</i>        | healthy fruitlet  | 533                | 100          | 0         | ITS              | MF281281.2               |
| BP366      | <i>Fusarium equiseti</i>         | infected fruitlet | 514                | 100          | 0         | ITS              | MK680159.1               |
| BP367      | <i>Fusarium ananatum</i>         | infected fruitlet | 669                | 100          | 0         | EF1 $\alpha$     | MT010996.1               |
| BP368      | <i>Fusarium oxysporum</i>        | infected fruitlet | 663                | 99,7         | 0         | EF1 $\alpha$     | MN386739.1               |
| BP369      | <i>Fusarium oxysporum</i>        | infected fruitlet | 539                | 100          | 0         | ITS              | KC119203.1               |
| BP370      | <i>Aspergillus flavus</i>        | infected fruitlet | 336                | 100          | 0         | ITS              | MF152938.1               |

Table S1. Continued

| Isolate ID | Identification                  | Sampled tissue    | Fragment size (bp) | Identity (%) | E-value   | Locus            | GenBank accession number |
|------------|---------------------------------|-------------------|--------------------|--------------|-----------|------------------|--------------------------|
| BP371      | <i>Fusarium proliferatum</i>    | healthy fruitlet  | 538                | 100          | 0         | ITS              | MH055399.1               |
| BP372      | <i>Fusarium fujikuroi</i>       | healthy fruitlet  | 539                | 100          | 0         | ITS              | MF281281.2               |
| BP373      | <i>Fusarium proliferatum</i>    | infected fruitlet | 671                | 100          | 0         | EF1 $\alpha$     | MK442093.1               |
| BP376      | <i>Fusarium fujikuroi</i>       | healthy fruitlet  | 531                | 100          | 0         | ITS              | MF281281.2               |
| BP379      | <i>Fusarium ananatum</i>        | healthy fruitlet  | 658                | 100          | 0         | EF1 $\alpha$     | MT010996.1               |
| BP383      | <i>Fusarium ananatum</i>        | infected fruitlet | 656                | 100          | 0         | EF1 $\alpha$     | MT010996.1               |
| BP384      | <i>Fusarium ananatum</i>        | infected fruitlet | 655                | 100          | 0         | EF1 $\alpha$     | MT010996.1               |
| BP388      | <i>Fusarium ananatum</i>        | healthy fruitlet  | 671                | 100          | 0         | EF1 $\alpha$     | MT010996.1               |
| BP389      | <i>Fusarium equiseti</i>        | infected fruitlet | 507                | 100          | 0         | ITS              | MH879584.1               |
| BP391      | <i>Fusarium proliferatum</i>    | infected fruitlet | 660                | 100          | 0         | EF1 $\alpha$     | MN539103.1               |
| BP393      | <i>Fusarium proliferatum</i>    | infected fruitlet | 531                | 99,81        | 0         | ITS              | MH055399.1               |
| BP395      | <i>Fusarium solani</i>          | infected fruitlet | 686                | 100          | 0         | EF1 $\alpha$     | MN200289.1               |
| BP396      | <i>Fusarium solani</i>          | infected fruitlet | 549                | 100          | 0         | ITS              | MK968891.1               |
| BP400      | <i>Fusarium ananatum</i>        | healthy fruitlet  | 669                | 100          | 0         | EF1 $\alpha$     | MT010996.1               |
| BP402      | <i>Fusarium verticillioides</i> | infected fruitlet | 526                | 100          | 0         | ITS              | MT594370.1               |
| BP405      | <i>Talaromyces amestolkiae</i>  | healthy fruitlet  | 414                | 100          | 0         | $\beta$ -tubulin | MH287203.1               |
| BP406      | <i>Fusarium solani</i>          | healthy fruitlet  | 548                | 100          | 0         | ITS              | JX173101.1               |
| BP407      | <i>Fusarium ananatum</i>        | infected fruitlet | 670                | 100          | 0         | EF1 $\alpha$     | MT010996.1               |
| BP409      | <i>Fusarium solani</i>          | infected fruitlet | 526                | 100          | 0         | ITS              | KF030977.1               |
| BP410      | <i>Fusarium ananatum</i>        | healthy fruitlet  | 673                | 100          | 0         | EF1 $\alpha$     | MT010996.1               |
| BP413      | <i>Fusarium proliferatum</i>    | healthy fruitlet  | 669                | 99,85        | 0         | EF1 $\alpha$     | KF993985.1               |
| BP414      | <i>Fusarium verticillioides</i> | infected fruitlet | 524                | 100          | 0         | ITS              | MT594370.1               |
| BP416      | <i>Talaromyces amestolkiae</i>  | infected fruitlet | 406                | 100          | 0         | $\beta$ -tubulin | KJ413360.1               |
| BP417      | <i>Fusarium sp.</i>             | healthy fruitlet  | 513                | 100          | 0         | ITS              | MH777054.1               |
| BP418      | <i>Aspergillus niger</i>        | infected fruitlet | 569                | 100          | 0         | ITS              | KY357318.1               |
| BP420      | <i>Fusarium verticillioides</i> | healthy fruitlet  | 662                | 100          | 0         | EF1 $\alpha$     | MN861780.1               |
| BP421      | <i>Fusarium verticillioides</i> | infected fruitlet | 661                | 100          | 0         | EF1 $\alpha$     | MT095057.1               |
| BP422      | <i>Fusarium ananatum</i>        | healthy fruitlet  | 636                | 100          | 0         | EF1 $\alpha$     | MT010996.1               |
| BP423      | <i>Fusarium ananatum</i>        | infected fruitlet | 656                | 100          | 0         | EF1 $\alpha$     | MT010996.1               |
| BP426      | <i>Fusarium incarnatum</i>      | infected fruitlet | 290                | 99,66        | 4,00E-148 | $\beta$ -tubulin | MK752398.1               |
| BP428      | <i>Fusarium proliferatum</i>    | infected fruitlet | 661                | 100          | 0         | EF1 $\alpha$     | MN539103.1               |
| BP429      | <i>Fusarium proliferatum</i>    | infected fruitlet | 676                | 100          | 0         | EF1 $\alpha$     | FJ538242.1               |
| BP430      | <i>Fusarium ananatum</i>        | infected fruitlet | 659                | 100          | 0         | EF1 $\alpha$     | MT010996.1               |
| BP431      | <i>Fusarium proliferatum</i>    | healthy fruitlet  | 512                | 100          | 0         | ITS              | MT563410.1               |
| BP432      | <i>Cosmospora butyri</i>        | healthy fruitlet  | 530                | 100          | 0         | ITS              | KU204560.1               |
| BP433      | <i>Fusarium proliferatum</i>    | healthy fruitlet  | 283                | 100          | 7,00E-146 | $\beta$ -tubulin | MH398186.1               |
| BP434      | <i>Fusarium solani</i>          | healthy fruitlet  | 532                | 100          | 0         | ITS              | MK968891.1               |
| BP435      | <i>Fusarium verticillioides</i> | healthy fruitlet  | 541                | 100          | 0         | ITS              | MT594370.1               |
| BP436      | <i>Fusarium proliferatum</i>    | infected fruitlet | 530                | 100          | 0         | ITS              | MH712288.1               |
| BP438      | <i>Fusarium falciforme</i>      | healthy fruitlet  | 547                | 100          | 0         | ITS              | MT251175.1               |
| BP441      | <i>Phialemoniopsis curvata</i>  | infected fruitlet | 531                | 99,26        | 0         | ITS              | AB278180.1               |
| BP442      | <i>Fusarium equiseti</i>        | infected fruitlet | 498                | 100          | 0         | ITS              | MH578585.1               |
| BP443      | <i>Fusarium ananatum</i>        | infected fruitlet | 659                | 100          | 0         | EF1 $\alpha$     | MT010996.1               |
| BP444      | <i>Fusarium sp.</i>             | healthy fruitlet  | 651                | 98,79        | 0         | EF1 $\alpha$     | JF740861.1               |
| BP445      | <i>Fusarium oxysporum</i>       | healthy fruitlet  | 676                | 100          | 0         | EF1 $\alpha$     | MN417196.1               |
| BP447      | <i>Fusarium ananatum</i>        | healthy fruitlet  | 656                | 100          | 0         | EF1 $\alpha$     | MT010996.1               |
| BP449      | <i>Fusarium oxysporum</i>       | healthy fruitlet  | 675                | 99,7         | 0         | EF1 $\alpha$     | MN417202.1               |
| BP450      | <i>Fusarium incarnatum</i>      | healthy fruitlet  | 306                | 99,35        | 1,00E-154 | $\beta$ -tubulin | MK752398.1               |
| BP454      | <i>Fusarium oxysporum</i>       | healthy fruitlet  | 666                | 100          | 0         | EF1 $\alpha$     | CP053267.1               |
| BP458      | <i>Fusarium oxysporum</i>       | healthy fruitlet  | 671                | 100          | 0         | EF1 $\alpha$     | MN507111.1               |



Table S1. Continued

| Isolate ID | Identification                   | Sampled tissue    | Fragment size (bp) | Identity (%) | E-value   | Locus            | GenBank accession number |
|------------|----------------------------------|-------------------|--------------------|--------------|-----------|------------------|--------------------------|
| BP459      | <i>Fusarium oxysporum</i>        | infected fruitlet | 454                | 99,34        | 0         | ITS              | MH777057.1               |
| BP460      | <i>Fusarium oxysporum</i>        | infected fruitlet | 666                | 100          | 0         | EF1 $\alpha$     | MN507111.1               |
| BP462      | <i>Talaromyces stollii</i>       | infected fruitlet | 398                | 100          | 0         | $\beta$ -tubulin | JX315634.1               |
| BP463      | <i>Fusarium ananatum</i>         | infected fruitlet | 664                | 100          | 0         | EF1 $\alpha$     | MT010996.1               |
| BP465      | <i>Fusarium ananatum</i>         | infected fruitlet | 661                | 100          | 0         | EF1 $\alpha$     | MT010996.1               |
| BP468      | <i>Fusarium ananatum</i>         | healthy fruitlet  | 483                | 99,44        | 0         | EF1 $\alpha$     | MT010996.1               |
| BP469      | <i>Fusarium verticillioides</i>  | healthy fruitlet  | 662                | 100          | 0         | EF1 $\alpha$     | MN861780.1               |
| BP473      | <i>Fusarium solani</i>           | infected fruitlet | 508                | 100          | 0         | ITS              | MK968891.1               |
| BP474      | <i>Fusarium napiforme</i>        | healthy fruitlet  | 517                | 100          | 0         | ITS              | MH685904.1               |
| BP475      | <i>Fusarium verticillioides</i>  | healthy fruitlet  | 659                | 100          | 0         | EF1 $\alpha$     | MT095057.1               |
| BP476      | <i>Fusarium oxysporum</i>        | healthy fruitlet  | 290                | 100          | 9,00E-150 | $\beta$ -tubulin | MF806523.1               |
| BP477      | <i>Fusarium proliferatum</i>     | infected fruitlet | 660                | 100          | 0         | EF1 $\alpha$     | MN386746.1               |
| BP478      | <i>Fusarium proliferatum</i>     | infected fruitlet | 661                | 100          | 0         | EF1 $\alpha$     | MN386746.1               |
| BP482      | <i>Fusarium incarnatum</i>       | infected fruitlet | 526                | 100          | 0         | ITS              | MH712152.1               |
| BP483      | <i>Fusarium equiseti</i>         | infected fruitlet | 524                | 100          | 0         | ITS              | MT558602.1               |
| BP484      | <i>Fusarium sp.</i>              | infected fruitlet | 146                | 99,32        | 7,00E-68  | ITS              | MH777054.1               |
| BP485      | <i>Fusarium proliferatum</i>     | healthy fruitlet  | 659                | 100          | 0         | EF1 $\alpha$     | MN539103.1               |
| BP486      | <i>Fusarium proliferatum</i>     | infected fruitlet | 660                | 100          | 0         | EF1 $\alpha$     | MK442093.1               |
| BP487      | <i>Phialemoniopsis curvata</i>   | infected fruitlet | 519                | 99,43        | 0         | ITS              | AB278180.1               |
| BP488      | <i>Fusarium verticillioides</i>  | infected fruitlet | 541                | 100          | 0         | ITS              | MT594370.1               |
| BP490      | <i>Phialemoniopsis curvata</i>   | infected fruitlet | 535                | 99,44        | 0         | ITS              | AB278180.1               |
| BP492      | <i>Fusarium verticillioides</i>  | infected fruitlet | 528                | 100          | 0         | ITS              | MT594370.1               |
| BP493      | <i>Phialemoniopsis curvata</i>   | healthy fruitlet  | 508                | 99,41        | 0         | ITS              | AB278180.1               |
| BP494      | <i>Fusarium ananatum</i>         | healthy fruitlet  | 661                | 100          | 0         | EF1 $\alpha$     | MT010996.1               |
| BP495      | <i>Phialemoniopsis curvata</i>   | infected fruitlet | 511                | 99,42        | 0         | ITS              | AB278180.1               |
| BP496      | <i>Phialemoniopsis curvata</i>   | infected fruitlet | 518                | 99,42        | 0         | ITS              | AB278180.1               |
| BP497      | <i>Fusarium oxysporum</i>        | healthy fruitlet  | 510                | 100          | 0         | ITS              | EU152473.1               |
| BP499      | <i>Fusarium equiseti</i>         | infected fruitlet | 527                | 99,81        | 0         | ITS              | MH879584.1               |
| BP500      | <i>Fusarium ananatum</i>         | infected fruitlet | 659                | 100          | 0         | EF1 $\alpha$     | MT010996.1               |
| BP501      | <i>Phialemoniopsis curvata</i>   | infected fruitlet | 508                | 99,41        | 0         | ITS              | AB278180.1               |
| BP503      | <i>Phialemoniopsis curvata</i>   | infected fruitlet | 506                | 99,41        | 0         | ITS              | AB278180.1               |
| BP504      | <i>Phialemoniopsis curvata</i>   | healthy fruitlet  | 507                | 99,21        | 0         | ITS              | AB278180.1               |
| BP507      | <i>Lasiodiplodia mahajangana</i> | healthy fruitlet  | 401                | 100          | 0         | ITS              | MH057188.1               |
| BP511      | <i>Fusarium verticillioides</i>  | healthy fruitlet  | 660                | 100          | 0         | EF1 $\alpha$     | MN861780.1               |
| BP512      | <i>Fusarium verticillioides</i>  | healthy fruitlet  | 660                | 100          | 0         | EF1 $\alpha$     | MN861772.1               |
| BP513      | <i>Fusarium proliferatum</i>     | healthy fruitlet  | 671                | 100          | 0         | EF1 $\alpha$     | KF993985.1               |
| BP515      | <i>Aspergillus oryzae</i>        | infected fruitlet | 562                | 100          | 0         | ITS              | MN648727.1               |
| BP516      | <i>Aspergillus flavus</i>        | infected fruitlet | 515                | 100          | 0         | ITS              | MN955851.1               |
| BP518      | <i>Fusarium verticillioides</i>  | healthy fruitlet  | 640                | 100          | 0         | EF1 $\alpha$     | MN861768.1               |
| BP519      | <i>Phialemoniopsis curvata</i>   | healthy fruitlet  | 505                | 99,41        | 0         | ITS              | AB278180.1               |
| BP520      | <i>Clonostachys rosea</i>        | healthy fruitlet  | 406                | 97,78        | 0         | ITS              | MH047188.1               |
| BP521      | <i>Phialemoniopsis curvata</i>   | infected fruitlet | 519                | 99,43        | 0         | ITS              | AB278180.1               |
| BP522      | <i>Fusarium verticillioides</i>  | infected fruitlet | 529                | 100          | 0         | ITS              | MT594370.1               |
| BP523      | <i>Fusarium proliferatum</i>     | healthy fruitlet  | 656                | 99,7         | 0         | EF1 $\alpha$     | KU872092.1               |
| BP526      | <i>Fusarium dlamini</i>          | healthy fruitlet  | 538                | 100          | 0         | ITS              | MN173109.1               |
| BP527      | <i>Fusarium proliferatum</i>     | infected fruitlet | 660                | 100          | 0         | EF1 $\alpha$     | KF993985.1               |
| BP528      | <i>Fusarium solani</i>           | infected fruitlet | 541                | 100          | 0         | ITS              | MT594367.1               |
| BP529      | <i>Fusarium verticillioides</i>  | infected fruitlet | 636                | 100          | 0         | EF1 $\alpha$     | MN861780.1               |
| BP530      | <i>Fusarium ananatum</i>         | healthy fruitlet  | 656                | 100          | 0         | EF1 $\alpha$     | MT010996.1               |
| BP532      | <i>Fusarium solani</i>           | infected fruitlet | 541                | 100          | 0         | ITS              | MT594367.1               |

Table S1. Continued

| Isolate ID | Identification                   | Sampled tissue    | Fragment size (bp) | Identity (%) | E-value   | Locus            | GenBank accession number |
|------------|----------------------------------|-------------------|--------------------|--------------|-----------|------------------|--------------------------|
| BP533      | <i>Fusarium verticillioides</i>  | infected fruitlet | 656                | 100          | 0         | EF1 $\alpha$     | MH496632.1               |
| BP534      | <i>Fusarium proliferatum</i>     | infected fruitlet | 660                | 100          | 0         | EF1 $\alpha$     | MK442093.1               |
| BP536      | <i>Fusarium verticillioides</i>  | healthy fruitlet  | 658                | 100          | 0         | EF1 $\alpha$     | MT095057.1               |
| BP537      | <i>Phialemoniopsis curvata</i>   | healthy fruitlet  | 389                | 99,49        | 0         | ITS              | AB278180.1               |
| BP538      | <i>Lasiodiplodia citricola</i>   | healthy fruitlet  | 416                | 100          | 0         | $\beta$ -tubulin | KU530119.1               |
| BP539      | <i>Lasiodiplodia theobromae</i>  | healthy fruitlet  | 415                | 100          | 0         | $\beta$ -tubulin | KR260829.1               |
| BP540      | <i>Fusarium sp.</i>              | healthy fruitlet  | 514                | 100          | 0         | ITS              | FJ008991.1               |
| BP543      | <i>Fusarium fujikuroi</i>        | healthy fruitlet  | 378                | 100          | 0         | ITS              | MN963682.1               |
| BP544      | <i>Fusarium proliferatum</i>     | infected fruitlet | 659                | 100          | 0         | EF1 $\alpha$     | MT095058.1               |
| BP546      | <i>Fusarium solani</i>           | healthy fruitlet  | 535                | 100          | 0         | ITS              | JN006817.1               |
| BP548      | <i>Fusarium solani</i>           | healthy fruitlet  | 548                | 100          | 0         | ITS              | KX621960.1               |
| BP549      | <i>Fusarium falciforme</i>       | healthy fruitlet  | 538                | 100          | 0         | ITS              | MT251175.1               |
| BP550      | <i>Aspergillus flavus</i>        | infected fruitlet | 576                | 100          | 0         | ITS              | MF120213.1               |
| BP551      | <i>Aspergillus niger</i>         | infected fruitlet | 565                | 100          | 0         | ITS              | MN788116.1               |
| BP555      | <i>Fusarium sp.</i>              | healthy fruitlet  | 610                | 99,02        | 0         | EF1 $\alpha$     | JF740861.1               |
| BP556      | <i>Fusarium proliferatum</i>     | infected fruitlet | 661                | 100          | 0         | EF1 $\alpha$     | MN386746.1               |
| BP559      | <i>Fusarium sp.</i>              | healthy fruitlet  | 645                | 98,77        | 0         | EF1 $\alpha$     | JF740861.1               |
| BP563      | <i>Fusarium solani</i>           | infected fruitlet | 550                | 100          | 0         | ITS              | KX621960.1               |
| BP564      | <i>Fusarium proliferatum</i>     | healthy fruitlet  | 661                | 100          | 0         | EF1 $\alpha$     | MN386746.1               |
| BP565      | <i>Fusarium ananatum</i>         | healthy fruitlet  | 658                | 100          | 0         | EF1 $\alpha$     | MT010996.1               |
| BP566      | <i>Fusarium sp.</i>              | infected fruitlet | 516                | 100          | 0         | ITS              | MT530119.1               |
| BP567      | <i>Fusarium solani</i>           | healthy fruitlet  | 543                | 100          | 0         | ITS              | MT594367.1               |
| BP570      | <i>Fusarium proliferatum</i>     | healthy fruitlet  | 663                | 100          | 0         | EF1 $\alpha$     | KF993986.1               |
| BP572      | <i>Fusarium fujikuroi</i>        | healthy fruitlet  | 452                | 100          | 0         | ITS              | MN963682.1               |
| BP573      | <i>Fusarium equiseti</i>         | healthy fruitlet  | 495                | 100          | 0         | ITS              | MN589630.1               |
| BP574      | <i>Fusarium solani</i>           | infected fruitlet | 638                | 99,69        | 0         | EF1 $\alpha$     | KY486693.1               |
| BP575      | <i>Fusarium sacchari</i>         | infected fruitlet | 660                | 100          | 0         | EF1 $\alpha$     | MN193868.1               |
| BP576      | <i>Phialemoniopsis curvata</i>   | healthy fruitlet  | 511                | 99,42        | 0         | ITS              | AB278180.1               |
| BP578      | <i>Phialemoniopsis curvata</i>   | infected fruitlet | 519                | 99,44        | 0         | ITS              | AB278180.1               |
| BP579      | <i>Fusarium chlamyosporum</i>    | healthy fruitlet  | 270                | 100          | 1,00E-138 | $\beta$ -tubulin | KJ125830.1               |
| BP580      | <i>Aspergillus flavus</i>        | infected fruitlet | 548                | 100          | 0         | ITS              | MN955851.1               |
| BP582      | <i>Davidiella sp.</i>            | healthy fruitlet  | 577                | 100          | 0         | ITS              | KX621979.1               |
| BP583      | <i>Aspergillus flavus</i>        | healthy fruitlet  | 558                | 100          | 0         | ITS              | MN006669.1               |
| BP584      | <i>Aspergillus welwitschiae</i>  | healthy fruitlet  | 560                | 100          | 0         | ITS              | MH374611.1               |
| BP585      | <i>Aspergillus flavus</i>        | healthy fruitlet  | 242                | 100          | 0         | ITS              | MK850352.1               |
| BP586      | <i>Aspergillus flavus</i>        | infected fruitlet | 552                | 99,82        | 0         | ITS              | MN238861.1               |
| BP589      | <i>Talaromyces stollii</i>       | infected fruitlet | 405                | 100          | 0         | $\beta$ -tubulin | JX315634.1               |
| BP590      | <i>Fusarium sp.</i>              | healthy fruitlet  | 651                | 98,79        | 0         | EF1 $\alpha$     | JF740861.1               |
| BP594      | <i>Penicillium sp.</i>           | healthy fruitlet  | 496                | 100          | 0         | ITS              | KU556148.1               |
| BP595      | <i>Fusarium sp.</i>              | healthy fruitlet  | 627                | 98,58        | 0         | EF1 $\alpha$     | JF740861.1               |
| BP596      | <i>Phialemoniopsis curvata</i>   | infected fruitlet | 518                | 99,43        | 0         | ITS              | AB278180.1               |
| BP597      | <i>Phialemoniopsis curvata</i>   | healthy fruitlet  | 520                | 99,44        | 0         | ITS              | AB278180.1               |
| BP598      | <i>Phialemoniopsis curvata</i>   | infected fruitlet | 520                | 99,44        | 0         | ITS              | AB278180.1               |
| BP599      | <i>Fusarium fujikuroi</i>        | healthy fruitlet  | 524                | 100          | 0         | ITS              | CP023090.1               |
| BP601      | <i>Phialemoniopsis curvata</i>   | infected fruitlet | 506                | 99,21        | 0         | ITS              | AB278180.1               |
| BP603      | <i>Talaromyces amestolkiae</i>   | healthy fruitlet  | 403                | 100          | 0         | $\beta$ -tubulin | MH287203.1               |
| BP604      | <i>Talaromyces purpureogenus</i> | infected fruitlet | 548                | 100          | 0         | ITS              | KJ528885.1               |
| BP605      | <i>Talaromyces amestolkiae</i>   | infected fruitlet | 402                | 100          | 0         | $\beta$ -tubulin | KJ413360.1               |
| BP611      | <i>Fusarium oxysporum</i>        | infected fruitlet | 665                | 100          | 0         | EF1 $\alpha$     | CP053267.1               |
| BP613      | <i>Fusarium verticillioides</i>  | healthy fruitlet  | 659                | 100          | 0         | EF1 $\alpha$     | MN861780.1               |

**Table S2.** Identification of fungal species isolated from soil coring points of cultures proximal to pineapple plots.

| Isolate ID | Identification                      | Adjacent crop   | Fragment size (bp) | Identity (%) | E-value   | GenBank accession number |
|------------|-------------------------------------|-----------------|--------------------|--------------|-----------|--------------------------|
| SBP050     | <i>Acrostalagmus sp.</i>            | jackfruit trees | 411                | 100          | 0         | MH482850.1               |
| SBP027     | <i>Aspergillus flavipes</i>         | mango orchard   | 569                | 99,82        | 0         | KF624764.1               |
| SBP035     | <i>Aspergillus flavipes</i>         | mango orchard   | 550                | 100          | 0         | KF624764.1               |
| SBP068     | <i>Aspergillus flavipes</i>         | mango orchard   | 576                | 100          | 0         | KF624764.1               |
| SBP002     | <i>Aspergillus sclerotiorum</i>     | mango orchard   | 588                | 100          | 0         | KC478519.1               |
| SBP010     | <i>Aspergillus sp.</i>              | mango orchard   | 410                | 100          | 0         | MK312294.1               |
| SBP005     | <i>Aspergillus subramanianii</i>    | mango orchard   | 483                | 100          | 0         | MK952313.1               |
| SBP044     | <i>Aspergillus tardicrescens</i>    | jackfruit trees | 449                | 99,78        | 0         | KY087686.1               |
| SBP020     | <i>Aureobasidium namibiae</i>       | mango orchard   | 196                | 100          | 2,00E-96  | MK794387.1               |
| SBP071     | <i>Bartalinia pondoensis</i>        | mango orchard   | 470                | 100          | 0         | NR153599.1               |
| SBP060     | <i>Bartalinia pondoensis</i>        | jackfruit trees | 564                | 100          | 0         | NR153599.1               |
| SBP040     | <i>Cladosporium cladosporioides</i> | jackfruit trees | 479                | 98,96        | 0         | MF475948.1               |
| SBP012     | <i>Cladosporium sp.</i>             | mango orchard   | 418                | 100          | 0         | MK336600.1               |
| SBP029     | <i>Cladosporium sp.</i>             | mango orchard   | 542                | 100          | 0         | MK336600.1               |
| SBP062     | <i>Cladosporium sp.</i>             | jackfruit trees | 542                | 100          | 0         | MN275867.1               |
| SBP043     | <i>Cladosporium tenuissimum</i>     | jackfruit trees | 547                | 99,63        | 0         | KX621982.1               |
| SBP083     | <i>Cystoflobasidiales sp.</i>       | jackfruit trees | 36                 | 97,22        | 1,00E-06  | MF615083.1               |
| SBP053     | <i>Diaporthe helianthi</i>          | jackfruit trees | 556                | 100          | 0         | KM979926.1               |
| SBP065     | <i>Diaporthe helianthi</i>          | jackfruit trees | 563                | 100          | 0         | KM979926.1               |
| SBP006     | <i>Edenia gomezpompae</i>           | mango orchard   | 526                | 99,81        | 0         | NR156217.1               |
| SBP022     | <i>Fennellia nivea</i>              | mango orchard   | 577                | 100          | 0         | FJ155814.1               |
| SBP069     | <i>Fennellia nivea</i>              | mango orchard   | 563                | 100          | 0         | FJ155814.1               |
| SBP017     | <i>Fusarium cf. solani</i>          | mango orchard   | 434                | 99,77        | 0         | MK336488.1               |
| SBP037     | <i>Fusarium equiseti</i>            | jackfruit trees | 492                | 100          | 0         | MG650603.1               |
| SBP076     | <i>Fusarium oxysporum</i>           | mango orchard   | 412                | 100          | 0         | MH777057.1               |
| SBP051     | <i>Fusarium polyphialidicum</i>     | jackfruit trees | 517                | 100          | 0         | HQ607880.1               |
| SBP054     | <i>Fusarium sp.</i>                 | jackfruit trees | 508                | 100          | 0         | KM099504.1               |
| SBP064     | <i>Fusarium sp.</i>                 | jackfruit trees | 396                | 100          | 0         | KM099504.1               |
| SBP023     | <i>Heterocephalum aurantiacum</i>   | mango orchard   | 374                | 99,73        | 0         | MH858803.1               |
| SBP079     | <i>Heterocephalum aurantiacum</i>   | mango orchard   | 419                | 100          | 0         | MH858803.1               |
| SBP021     | <i>Lecanicillium saksenae</i>       | mango orchard   | 565                | 100          | 0         | AB360363.1               |
| SBP034     | <i>Lecanicillium saksenae</i>       | mango orchard   | 537                | 100          | 0         | AB360363.1               |
| SBP073     | <i>Lecanicillium saksenae</i>       | mango orchard   | 543                | 100          | 0         | KY320616.1               |
| SBP028     | <i>Leptosphaeria spegazzinii</i>    | mango orchard   | 524                | 99,81        | 0         | MG664743.1               |
| SBP038     | <i>Mortierella horticola</i>        | jackfruit trees | 350                | 99,71        | 6,00E-180 | KC018245.1               |
| SBP007     | <i>Mortierella sp.</i>              | mango orchard   | 515                | 95,34        | 0         | KU612370.1               |
| SBP004     | <i>Penicillium citrinum</i>         | mango orchard   | 410                | 100          | 0         | KX363454.1               |
| SBP009     | <i>Penicillium guanacastense</i>    | mango orchard   | 523                | 99,24        | 0         | MH374548.1               |
| SBP052     | <i>Penicillium janthinellum</i>     | jackfruit trees | 444                | 100          | 0         | MG845261.1               |
| SBP067     | <i>Penicillium multicolor</i>       | mango orchard   | 521                | 100          | 0         | MH864874.1               |
| SBP003     | <i>Penicillium ochrochloron</i>     | mango orchard   | 555                | 99,82        | 0         | MG661735.1               |
| SBP019     | <i>Penicillium sclerotigenum</i>    | mango orchard   | 561                | 100          | 0         | MK334370.1               |
| SBP011     | <i>Penicillium sp.</i>              | mango orchard   | 564                | 100          | 0         | KT336528.1               |
| SBP018     | <i>Penicillium sp.</i>              | mango orchard   | 556                | 100          | 0         | HQ608086.1               |
| SBP026     | <i>Penicillium spinulosum</i>       | mango orchard   | 565                | 99,65        | 0         | MF476047.1               |
| SBP039     | <i>Penicillium sumatraense</i>      | jackfruit trees | 529                | 100          | 0         | MH864547.1               |
| SBP041     | <i>Penicillium sumatraense</i>      | jackfruit trees | 558                | 100          | 0         | MH864547.1               |
| SBP045     | <i>Penicillium sumatraense</i>      | jackfruit trees | 529                | 100          | 0         | MH864547.1               |
| SBP072     | <i>Peniophora sp.</i>               | mango orchard   | 826                | 100          | 0         | HQ608067.1               |
| SBP056     | <i>Pestalotiopsis sp.</i>           | jackfruit trees | 267                | 100          | 0         | LC040892.1               |
| SBP049     | <i>Phoma sp.</i>                    | jackfruit trees | 413                | 100          | 0         | JN207265.1               |
| SBP059     | <i>Plectosphaerella cucumerina</i>  | jackfruit trees | 516                | 100          | 0         | AB469880.1               |
| SBP063     | <i>Pleosporales sp.</i>             | jackfruit trees | 517                | 100          | 0         | MK247832.1               |
| SBP008     | <i>Purpureocillium lilacinum</i>    | mango orchard   | 582                | 99,66        | 0         | LN809016.1               |
| SBP058     | <i>Pyrenochaeta sp.</i>             | jackfruit trees | 503                | 99,6         | 0         | EU750693.1               |
| SBP025     | <i>Robillarda sessilis</i>          | mango orchard   | 553                | 99,46        | 0         | KR873255.1               |
| SBP030     | <i>Robillarda sessilis</i>          | mango orchard   | 568                | 99,47        | 0         | KR873255.1               |
| SBP057     | <i>Roussoella siamensis</i>         | jackfruit trees | 478                | 100          | 0         | NR155716.1               |
| SBP075     | <i>Talaromyces purpurogenus</i>     | mango orchard   | 536                | 100          | 0         | AB872822.1               |
| SBP055     | <i>Trichoderma guizhouense</i>      | jackfruit trees | 293                | 100          | 4,00E-150 | MN170570.1               |
| SBP001     | <i>Trichoderma harzianum</i>        | mango orchard   | 440                | 100          | 0         | MN326481.1               |
| SBP066     | <i>Xepicula leucotricha</i>         | jackfruit trees | 569                | 100          | 0         | MH858391.1               |

**Table S3.** Identification of fungal species from DNA extracted from DGGE gels corresponding to *Fusarium*- and *Talaromyces*-inoculated pineapple fruitlets.

| <b>Band</b> | <b>Inoculated species</b>      | <b>Identification</b>          | <b>Identity (%)</b> | <b>E-value</b>       | <b>GenBank accession number</b> |
|-------------|--------------------------------|--------------------------------|---------------------|----------------------|---------------------------------|
| a           | <i>Fusarium sacchari</i>       | <i>Fusarium sp.</i>            | 100                 | $2 \times 10^{-33}$  | FJ008992.1                      |
| b           | <i>Fusarium ananatum</i>       | <i>Fusarium sp.</i>            | 99.51               | $4 \times 10^{-100}$ | FJ210605.1                      |
| c           | <i>Talaromyces stollii</i>     | <i>Talaromyces stollii</i>     | 99.58               | $9 \times 10^{-117}$ | AB910938.1                      |
| d           | <i>Talaromyces amestolkiae</i> | <i>Talaromyces amestolkiae</i> | 100                 | $1 \times 10^{-104}$ | MT441607.1                      |
